# Cell-based high-throughput screens for the discovery of chemotherapeutic agents

Jennifer T. Fox<sup>1</sup> and Kyungjae Myung<sup>1</sup>

<sup>1</sup> Genome Instability Section, Genetics and Molecular Biology Branch, National Human Genome Research Institute, National Institutes of Health, Bethesda, MD

**Correspondence to:** Kyungjae Myung, **email:** kmyung@mail.nih.gov

**Keywords:** ATAD5-luciferase, genotoxins, DNA repair mutants, cancer, drug discovery

**Received:** April 26, 2012,

**Accepted:** May 29, 2012,

**Published:** May 29, 2012

Copyright: © Fox et al. This is an open-access article distributed under the terms of the Creative Commons Attribution License, which permits unrestricted use, distribution, and reproduction in any medium, provided the original author and source are credited.

## ABSTRACT:

**With modern advances in robotics and data processing, high-throughput screening (HTS) is playing an increasingly growing role in the drug discovery process. The ultimate success of HTS depends upon the development of assays that are robust and reproducible in miniaturized formats, have low false-positive rates, and can identify drugs that offer improvements over those currently on the market. One example of such an assay is the ATAD5-luciferase HTS assay, which identified three antioxidants that could kill cancer cells without inducing mutagenesis. Here we discuss the ATAD5-luciferase assay and expand upon the value of HTS in identifying other potential cancer drugs, focusing on cell-based assays that involve DNA damage or repair pathways.**

## INTRODUCTION

High-throughput screening (HTS) is an automated process that allows for the rapid testing of large chemical, genetic, or biological libraries. It utilizes 96-, 384-, or 1536-well microplates, robotics, liquid handling devices, sensitive detectors, and data-processing software to identify a small number of effectors of a particular biological mechanism from collections that can contain up to two million drug candidates or leads. HTS has increasingly been used by both academic institutions and pharmaceutical companies to identify diagnostic biomarkers [1], expedite and reduce the costs associated with the discovery of new drugs, and screen FDA-approved compounds for additional uses, purposes, and indications.

HTS requires the development of robust assays with high signal-to-noise ratios that are adaptable to small volumes. These assays can be either biochemical (cell-free) or cell-based. Examples of biochemical assays include fluorescence resonance energy transfer (FRET), fluorescence correlation spectroscopy (FCS), fluorescence intensity distribution analysis (FIDA), and *in vitro* transcription assays [2]. Examples of cell-based assays include RNAi [3], second messenger, cell proliferation, and reporter assays [4]. Cell-based assays have several advantages over biochemical assays: they enable screens to be conducted in a context that more

closely resembles a natural physiological state; in general, they are less costly and time-consuming in that they do not require purification of an active target protein; and they can immediately select against compounds that cannot permeate cellular membranes to reach intracellular targets, thereby eliminating additional validation steps. However, because they contain more than one target, cell-based assays may also require more complex secondary screens than HTS assays that use cell-free systems.

In this manuscript, we discuss the various cell-based HTS assays that have been developed to aid in the discovery of chemotherapeutic agents, focusing on those that exploit the DNA damage response. Such assays include tests for genotoxic agents, assays that utilize specific DNA repair mutants, and screens for compounds that can overcome chemoresistance.

## Screening for Genotoxic Compounds

Many chemotherapeutic treatments involve the administration of genotoxic compounds that damage DNA to the point of inducing cancer cell death via well-established DNA damage response signaling networks. Such genotoxins include alkylating agents (chlorambucil, cyclophosphamide), platinum drugs (cisplatin, oxaloplatin), antimetabolites (5-fluorouracil, methotrexate), anthracyclines (doxorubicin, daunorubicin),

and topoisomerase inhibitors (topotecan, etoposide), all of which stall DNA replication, collapse replication forks, and produce DNA double-strand breaks (DSBs), resulting in the apoptosis of rapidly dividing cells [5]. There are currently several cell-based HTS assays available to identify genotoxic compounds, including GreenScreen HC GADD45a-GFP (Gentronix Ltd.), BlueScreen HC (Gentronix Ltd.), CellCiphr p53 (Cellumen Inc.), and CellSensor p53-bla (Invitrogen Corp.) [6-8]. However, cell-based genotoxicity assays are notorious for high false-negative rates due to lack of metabolic activation and the removal of genotoxic lesions by the DNA repair system, and the results generated from the varied screens often only partially overlap due to differences in genotoxic mechanism [8]. Thus, there remains a need for new assays that can be used to discover additional genotoxic compounds.

To address this need, our laboratory recently developed the ATAD5-luciferase HTS assay [9], which exploits the stabilization of the ATAD5 protein following DNA damage [10]. This assay is robust and reproducible in a 1536-well plate format and exhibits a high specificity for genotoxic compounds. Most importantly, in a pilot screen of approximately 4,000 small molecules, the ATAD5-luciferase assay successfully identified three potential chemotherapeutic agents that offer improvements over conventional cancer drugs. These compounds, the antioxidants resveratrol, genistein, and baicalein, can kill rapidly dividing cells without inducing mutagenesis or chromosomal alterations, side-effects that may make cells more resilient to cell-cycle checkpoints or apoptosis [9]. Based on the success of this pilot study, we have since used the ATAD5-luciferase assay to screen a collection of 300,000 chemical probes from the Molecular Library Probe Production Centers Network, generating hundreds of hits that may eventually lead to the production of new and superior drugs to fight cancer (unpublished data).

### **Screening for Compounds that Target Specific DNA Repair Mutants**

Cancer cells often exhibit deficiencies in one of the six major DNA tolerance or repair pathways (base excision repair (BER), nucleotide excision repair (NER), mismatch repair (MMR), homologous recombination (HR), nonhomologous endjoining (NHEJ), and translesion DNA synthesis (TLS)) that protect cells against the accumulation of mutations and genomic instability. For example, 13% of breast cancers [11], 23% of advanced ovarian cancers [12], 6% of cervical cancers [13], and 4% of non-small-cell lung cancers [14] do not express BRCA1, a component of the HR machinery; missense mutations of the *FANCA* gene, whose protein product plays a key role in inter-strand crosslink repair, have been reported in 4-8% of acute myeloid leukemia

(AML) patients [15, 16]; and inherited mutations in the DNA MMR genes are thought to be responsible for approximately 5% of the new cases of colorectal cancer diagnosed each year [17]. Given that DNA repair genes could be sequenced during tumor biopsies, therapies that target specific DNA repair mutants may prove to be extremely beneficial in the era of personalized medicine.

In 2009, Takeda and colleagues reported the development of DNA-repair-deficient chicken DT40 cell lines that could be used for high-throughput genotoxicity screening [18, 19], and by extension, for cancer drug discovery. The advantages of the DT40 experimental system are numerous: they have a high efficiency of targeted integration that allows for the generation of genetic mutations with relative ease [20, 21], they display a stable karyotype and short doubling time, they are unable to completely repair any damage induced in the G1 phase of the cell cycle, they have an unusually long S phase, and they grow in suspension [18]. However, despite the fact that the DNA pathways are well-conserved throughout evolution, it remains to be seen whether the results generated from DT40 screens translate to human systems.

An ongoing project in our laboratory involves the use of the DNA-repair-deficient chicken DT40 cell lines in succession with the ATAD5-luciferase HTS described above. We test the genotoxic compounds uncovered by the ATAD5-luciferase assay in a high-throughput manner against a panel of DT40 cells deficient in Polymerase  $\beta$  (BER), Rev3 (TLS), XPA (NER), FANCC (inter-strand crosslink repair), Ku70/Rad54 (HR/NHEJ), and ATM (double-strand break signaling). Because MMR is not represented in this panel due to the diminished viability of DT40 cells lacking this pathway, we also test the ability of the hits from the ATAD5-luciferase assay to selectively kill a human tumor cell line impaired in the expression of the MMR protein MSH2. Additional human DNA repair-deficient cell lines are then used in a secondary screen to validate the compounds that reduced the viability of the DT40 mutants (unpublished data).

### **Screening for Compounds that Can Overcome Tumor Chemoresistance**

The failure of tumor cells to respond to chemotherapeutic agents presents the largest obstacle in successful cancer treatment. Drug resistance is frequently characterized by a cross-resistance to a number of structurally and functionally distinct agents, even those to which the tumors have never been exposed [22]. The primary mechanism by which tumor cells develop a multidrug resistant (MDR) phenotype involves changes in the expression of transporters that regulate intracellular drug concentrations. Most notable among these transporters is P-glycoprotein (P-gp), a

170 kDa member of the ATP-binding cassette (ABC) superfamily of drug efflux pumps that is known to export several classes of anti-cancer drugs including vinca alkaloids, anthracyclines, taxanes, epipodophyllotoxins, camptothecins, and anthracenes [23-26].

The discovery of ABC transporters and the establishment of MDR hamster, mouse, and human cell lines [27-30] led to enormous efforts beginning in the 1980s to generate inhibitors that could be used to reverse chemoresistance. Unfortunately, many of these first-through fourth-generation compounds performed poorly in clinical trials due to low bioavailability, unexpected secondary physiological effects, and unanticipated drug-drug interactions [31-33]. To address these shortcomings, several groups have designed HTS assays using human MDR cell lines to aid in the discovery of novel inhibitors of P-gp and other ABC transporters. The screening assays range from simple cytotoxicity assays to more complex fluorescence-based assays that utilize labeled substrates [34] or cell lines [35], and have successfully identified several putative reversal agents including mometasone furoate [36], NSC23925 [37], NSC77037 [38], pimozone, acacetin and loxapine [34]. In addition, the ATAD5-luciferase assay revealed two compounds, resveratrol and genistein, that were ultimately shown to selectively kill a P-gp overexpressing KB cell line [9]. Although there is one manuscript that reports an interaction between genistein and the C-terminal nucleotide-binding domain of mouse P-gp [39], no biochemical experiments have ever been conducted to directly test the interaction between resveratrol and P-gp.

Another mechanism that has been implicated in chemoresistance is increased DNA damage tolerance or repair [22], which is often seen following treatment with the genotoxic drugs discussed above [40]. Consequently, several biochemical HTS assays have been carried out to search for inhibitors of the many different DNA repair factors, including PARP-1 [41], Ape1 [42], RecA [43, 44], and Rad51 [45]. In addition, efforts are currently underway in our laboratory to identify inhibitors of the TLS polymerase Pol $\eta$  and the DNA damage response protein ATAD5 using cell-based HTS assays (unpublished data). The assay for Pol $\eta$  inhibitors is based on the observation that pol $\eta$ /pol $\zeta$  deficient chicken DT40 cells, which can tolerate various genotoxic stresses, become sensitive to DNA damaging agents when complemented with human Pol $\eta$  [46]. The screen for ATAD5 inhibitors utilizes the ATAD5-luciferase cell line [9], and is based on the premise that cells with reduced levels of the ATAD5 protein are hypersensitive to DNA damaging agents [10].

## CONCLUSION

Cell-based HTS assays are valuable tools for identifying a variety of potential chemotherapeutic agents, from general and mutant-specific genotoxins to inhibitors

of drug efflux pumps and DNA repair factors. Despite the incredible number of new therapeutic options that have been and will continue to be made available through HTS, many impediments to effective cancer treatment still remain: the efficacy of genotoxic agents is limited by their toxicity to normal tissues, the multifactorial nature of chemoresistance negates any benefit obtained by overcoming a single resistance mechanism, and the functional redundancy of the different DNA repair pathways can reduce the effectiveness of repair enzyme inhibitors. Thus, the next challenge will be to determine how the DNA damaging agents, repair inhibitors, and P-gp modulators identified using the assays described above can be used in combination with each other to achieve the best therapeutic outcome.

## ACKNOWLEDGMENTS

This research was supported by the National Human Genome Research Institute, National Institutes of Health, and by R03 MH092164-01 to K.M. K.M. especially thanks to E. Cho.

## REFERENCE

1. Ionov Y. A high throughput method for identifying personalized tumor-associated antigens. *Oncotarget*. 2010; 1(2):148-155.
2. Morachis JM, Huang R and Emerson BM. Identification of kinase inhibitors that target transcription initiation by RNA polymerase II. *Oncotarget*. 2011; 2(1-2):18-28.
3. Liu-Sullivan N, Zhang J, Bakleh A, Marchica J, Li J, Siolas D, Laquerre S, Degenhardt YY, Wooster R, Chang K, Hannon GF and Powers S. Pooled shRNA screen for sensitizers to inhibition of the mitotic regulator polo-like kinase (PLK1). *Oncotarget*. 2011; 2(12):1254-1264.
4. Murai R, Yoshida Y, Muraguchi T, Nishimoto E, Morioka Y, Kitayama H, Kondoh S, Kawazoe Y, Hiraoka M, Uesugi M and Noda M. A novel screen using the Reck tumor suppressor gene promoter detects both conventional and metastasis-suppressing anticancer drugs. *Oncotarget*. 2010; 1(4):252-264.
5. Michod D and Widmann C. DNA-damage sensitizers: potential new therapeutical tools to improve chemotherapy. *Crit Rev Oncol Hematol*. 2007; 63(2):160-171.
6. Walmsley RM and Tate M. The GADD45a-GFP GreenScreen HC assay. *Methods Mol Biol*. 2012; 817:231-250.
7. Hastwell PW, Chai LL, Roberts KJ, Webster TW, Harvey JS, Rees RW and Walmsley RM. High-specificity and high-sensitivity genotoxicity assessment in a human cell line: validation of the GreenScreen HC GADD45a-GFP genotoxicity assay. *Mutat Res*. 2006; 607(2):160-175.
8. Knight AW, Little S, Houck K, Dix D, Judson R, Richard A, McCarroll N, Akerman G, Yang C, Birrell L and

- Walmsley RM. Evaluation of high-throughput genotoxicity assays used in profiling the US EPA ToxCast chemicals. *Regul Toxicol Pharmacol.* 2009; 55(2):188-199.
9. Fox JT, Sakamuru S, Huang R, Teneva N, Simmons SO, Xia M, Tice RR, Austin CP and Myung K. High-throughput genotoxicity assay identifies antioxidants as inducers of DNA damage response and cell death. *Proc Natl Acad Sci U S A.* 2012; 109(14):5423-5428.
  10. Sikdar N, Banerjee S, Lee KY, Wincovitch S, Pak E, Nakanishi K, Jasin M, Dutra A and Myung K. DNA damage responses by human ELG1 in S phase are important to maintain genomic integrity. *Cell Cycle.* 2009; 8(19):3199-3207.
  11. Esteller M, Silva JM, Dominguez G, Bonilla F, Matias-Guiu X, Lerma E, Bussaglia E, Prat J, Harkes IC, Repasky EA, Gabrielson E, Schutte M, Baylin SB and Herman JG. Promoter hypermethylation and BRCA1 inactivation in sporadic breast and ovarian tumors. *J Natl Cancer Inst.* 2000; 92(7):564-569.
  12. Teodoridis JM, Hall J, Marsh S, Kannall HD, Smyth C, Curto J, Siddiqui N, Gabra H, McLeod HL, Strathdee G and Brown R. CpG island methylation of DNA damage response genes in advanced ovarian cancer. *Cancer Res.* 2005; 65(19):8961-8967.
  13. Narayan G, Arias-Pulido H, Koul S, Vargas H, Zhang FF, Vilella J, Schneider A, Terry MB, Mansukhani M and Murty VV. Frequent promoter methylation of CDH1, DAPK, RARB, and HIC1 genes in carcinoma of cervix uteri: its relationship to clinical outcome. *Mol Cancer.* 2003; 2:24.
  14. Marsit CJ, Liu M, Nelson HH, Posner M, Suzuki M and Kelsey KT. Inactivation of the Fanconi anemia/BRCA pathway in lung and oral cancers: implications for treatment and survival. *Oncogene.* 2004; 23(4):1000-1004.
  15. Condie A, Powles RL, Hudson CD, Shepherd V, Bevan S, Yuille MR and Houlston RS. Analysis of the Fanconi anaemia complementation group A gene in acute myeloid leukaemia. *Leuk Lymphoma.* 2002; 43(9):1849-1853.
  16. Tischkowitz MD, Morgan NV, Grimwade D, Eddy C, Ball S, Vorechovsky I, Langabeer S, Stoger R, Hodgson SV and Mathew CG. Deletion and reduced expression of the Fanconi anemia FANCA gene in sporadic acute myeloid leukemia. *Leukemia.* 2004; 18(3):420-425.
  17. Lynch HT and de la Chapelle A. Genetic susceptibility to non-polyposis colorectal cancer. *J Med Genet.* 1999; 36(11):801-818.
  18. Evans TJ, Yamamoto KN, Hirota K and Takeda S. Mutant cells defective in DNA repair pathways provide a sensitive high-throughput assay for genotoxicity. *DNA Repair (Amst).* 2010; 9(12):1292-1298.
  19. Ji K, Kogame T, Choi K, Wang X, Lee J, Taniguchi Y and Takeda S. A novel approach using DNA-repair-deficient chicken DT40 cell lines for screening and characterizing the genotoxicity of environmental contaminants. *Environ Health Perspect.* 2009; 117(11):1737-1744.
  20. Buerstedde JM and Takeda S. Increased ratio of targeted to random integration after transfection of chicken B cell lines. *Cell.* 1991; 67(1):179-188.
  21. Yamazoe M, Sonoda E, Hochegger H and Takeda S. Reverse genetic studies of the DNA damage response in the chicken B lymphocyte line DT40. *DNA Repair (Amst).* 2004; 3(8-9):1175-1185.
  22. Gatti L and Zunino F. Overview of tumor cell chemoresistance mechanisms. *Methods Mol Med.* 2005; 111:127-148.
  23. Gottesman MM and Ling V. The molecular basis of multidrug resistance in cancer: the early years of P-glycoprotein research. *FEBS Lett.* 2006; 580(4):998-1009.
  24. Schinkel AH and Jonker JW. Mammalian drug efflux transporters of the ATP binding cassette (ABC) family: an overview. *Adv Drug Deliv Rev.* 2003; 55(1):3-29.
  25. Huang Y and Sadee W. Membrane transporters and channels in chemoresistance and -sensitivity of tumor cells. *Cancer Lett.* 2006; 239(2):168-182.
  26. Sharom FJ. ABC multidrug transporters: structure, function and role in chemoresistance. *Pharmacogenomics.* 2008; 9(1):105-127.
  27. Kartner N, Riordan JR and Ling V. Cell surface P-glycoprotein associated with multidrug resistance in mammalian cell lines. *Science.* 1983; 221(4617):1285-1288.
  28. Clarke R, Currier S, Kaplan O, Lovelace E, Boulay V, Gottesman MM and Dickson RB. Effect of P-glycoprotein expression on sensitivity to hormones in MCF-7 human breast cancer cells. *J Natl Cancer Inst.* 1992; 84(19):1506-1512.
  29. Kugawa F, Suzuki T, Miyata M, Tomono K and Tamanoi F. Construction of a model cell line for the assay of MDR1 (multi drug resistance gene-1) substrates/inhibitors using HeLa cells. *Pharmazie.* 2009; 64(5):296-300.
  30. Shen DW, Cardarelli C, Hwang J, Cornwell M, Richert N, Ishii S, Pastan I and Gottesman MM. Multiple drug-resistant human KB carcinoma cells independently selected for high-level resistance to colchicine, adriamycin, or vinblastine show changes in expression of specific proteins. *J Biol Chem.* 1986; 261(17):7762-7770.
  31. Gottesman MM, Fojo T and Bates SE. Multidrug resistance in cancer: role of ATP-dependent transporters. *Nat Rev Cancer.* 2002; 2(1):48-58.
  32. Robert J and Jarry C. Multidrug resistance reversal agents. *J Med Chem.* 2003; 46(23):4805-4817.
  33. Bates SF, Chen C, Robey R, Kang M, Figg WD and Fojo T. Reversal of multidrug resistance: lessons from clinical oncology. *Novartis Found Symp.* 2002; 243:83-96; discussion 96-102, 180-105.
  34. Ivnitski-Steele I, Larson RS, Lovato DM, Khawaja HM, Winter SS, Oprea TI, Sklar LA and Edwards BS. High-

- throughput flow cytometry to detect selective inhibitors of ABCB1, ABCC1, and ABCG2 transporters. *Assay Drug Dev Technol.* 2008; 6(2):263-276.
35. Brimacombe KR, Hall MD, Auld DS, Inglese J, Austin CP, Gottesman MM and Fung KL. A dual-fluorescence high-throughput cell line system for probing multidrug resistance. *Assay Drug Dev Technol.* 2009; 7(3):233-249.
  36. Winter SS, Lovato DM, Khawaja HM, Edwards BS, Steele ID, Young SM, Oprea TI, Sklar LA and Larson RS. High-throughput screening for daunorubicin-mediated drug resistance identifies mometasone furoate as a novel ABCB1-reversal agent. *J Biomol Screen.* 2008; 13(3):185-193.
  37. Duan Z, Choy E and Hornicek FJ. NSC23925, identified in a high-throughput cell-based screen, reverses multidrug resistance. *PLoS One.* 2009; 4(10):e7415.
  38. Susa M, Choy E, Yang C, Schwab J, Mankin H, Hornicek F and Duan Z. Multidrug resistance reversal agent, NSC77037, identified with a cell-based screening assay. *J Biomol Screen.* 2010; 15(3):287-296.
  39. Conseil G, Baubichon-Cortay H, Dayan G, Jault JM, Barron D and Di Pietro A. Flavonoids: a class of modulators with bifunctional interactions at vicinal ATP- and steroid-binding sites on mouse P-glycoprotein. *Proc Natl Acad Sci U S A.* 1998; 95(17):9831-9836.
  40. Chaney SG and Sancar A. DNA repair: enzymatic mechanisms and relevance to drug response. *J Natl Cancer Inst.* 1996; 88(19):1346-1360.
  41. Dillon KJ, Smith GC and Martin NM. A FlashPlate assay for the identification of PARP-1 inhibitors. *J Biomol Screen.* 2003; 8(3):347-352.
  42. Bapat A, Glass LS, Luo M, Fishel ML, Long EC, Georgiadis MM and Kelley MR. Novel small-molecule inhibitor of apurinic/apyrimidinic endonuclease 1 blocks proliferation and reduces viability of glioblastoma cells. *J Pharmacol Exp Ther.* 2010; 334(3):988-998.
  43. Peterson EJ, Janzen WP, Kireev D and Singleton SF. High-Throughput Screening for RecA Inhibitors Using a Transcreeper Adenosine 5'-O-Diphosphate Assay. *Assay Drug Dev Technol.* 2011.
  44. Sexton JZ, Wigle TJ, He Q, Hughes MA, Smith GR, Singleton SF, Williams AL and Yeh LA. Novel Inhibitors of *E. coli* RecA ATPase Activity. *Curr Chem Genomics.* 2010; 4:34-42.
  45. Huang F, Motlekar NA, Burgwin CM, Napper AD, Diamond SL and Mazin AV. Identification of specific inhibitors of human RAD51 recombinase using high-throughput screening. *ACS Chem Biol.* 2011; 6(6):628-635.
  46. Hirota K, Sonoda E, Kawamoto T, Motegi A, Masutani C, Hanaoka F, Szuts D, Iwai S, Sale JE, Lehmann A and Takeda S. Simultaneous disruption of two DNA polymerases, Poleta and Polzeta, in Avian DT40 cells unmasks the role of Poleta in cellular response to various DNA lesions. *PLoS Genet.* 2010; 6(10).
